# Supplementary material for: The impact of nanostructure on hygroscopicity and reactivity of fatty acid atmospheric aerosol proxies
Source: Copernicus journal article supplement (doi:10.5194/egusphere-2024-905), 2024-04-05
Supplement: Supplementary file 1 [file egusphere-2024-905-supplement.pdf]

**Electronic Supplementary Information (ESI) for “The impact of nanostructure on hygroscopicity and reactivity of fatty acid atmospheric aerosol proxies”**

**S1. Kinetic and hygroscopicity data**

Observed pseudo-first order decay constants ( $k_{obs}$ ) were measured in the same way as described in Milsom *et al.* – where the SAXS peak area was followed as a function of time.<sup>1</sup> Taking the natural log of each peak area normalised to the initial peak area, and plotting this against time, afforded a linear plot with the gradient being  $k_{obs}$ .

The key points are: (i)  $k_{obs}$  was measured at the fastest point of the reaction – where the decay was pseudo-first order (see Fig. 6 in the main text); (ii) these  $k_{obs}$  values are a measure of the rate of decay of oleic acid *in that nanostructure* – it is clear from the Raman decay (Fig. 6(f) in the main text) that oleic acid remains in the film after the destruction of the initially observed ordered phases.

| <b>Nanostructure</b> | <b>wt % fructose</b> | <b><math>k_{obs} / \times 10^{-2} \text{ min}^{-1}</math></b> | <b><math>k_{obs} \text{ (uncert.)} / \times 10^{-2} \text{ min}^{-1}</math></b> | <b>Thickness / <math>\mu\text{m}</math></b> |
|----------------------|----------------------|---------------------------------------------------------------|---------------------------------------------------------------------------------|---------------------------------------------|
| Liquid               | 0                    | 23                                                            | 3                                                                               | 50                                          |
| Inv. Mic.            | 20                   | 31                                                            | 7                                                                               | 95                                          |
| Inv. Mic.            | 50                   | 45                                                            | 10                                                                              | 95                                          |
| Ord. Inv. Mic.       | 33                   | 18                                                            | 2                                                                               | 83                                          |
| Lam.                 | 0                    | 7                                                             | 5                                                                               | 0.59                                        |
| Lam.                 | 0                    | 0.64                                                          | 0.01                                                                            | 73                                          |
| Solid                | 0                    | 0.04                                                          | 0.01                                                                            | 50                                          |

Table S1. Kinetic data with measured pseudo-first order decay constants ( $k_{obs}$ ) and corresponding nanostructure, composition and film thickness data. The “liquid” and “solid” nanostructures correspond to oleic acid and sodium oleate on their own, respectively – these were measured using Raman spectroscopy as described in Milsom *et al.*<sup>1</sup> All data with 0 wt % fructose are taken from Milsom *et al.*<sup>1</sup>

| <b>Nanostructure</b> | <b>wt % fructose</b> | <b><math>\kappa</math></b> | <b><math>\kappa \text{ (uncert.)}</math></b> | <b>Thickness / <math>\mu\text{m}</math></b> |
|----------------------|----------------------|----------------------------|----------------------------------------------|---------------------------------------------|
| Inv. Mic.            | 20                   | 0.342                      | 0.02                                         | 39                                          |
| Inv. Mic.            | 33                   | 0.48                       | 0.03                                         | 293                                         |
| Inv. Mic.            | 50                   | 0.35                       | 0.05                                         | 34                                          |
| Lam.                 | 20                   | 0.023                      | 0.001                                        | 39                                          |
| Hex.                 | 33                   | 0.048                      | 0.002                                        | 293                                         |

Table S2. Hygroscopicity data for each phase measured from changes in nano-structural  $d$ -spacing with changes in humidity.

## S2. The inverse micellar phase formed at high humidity without the addition of fructose

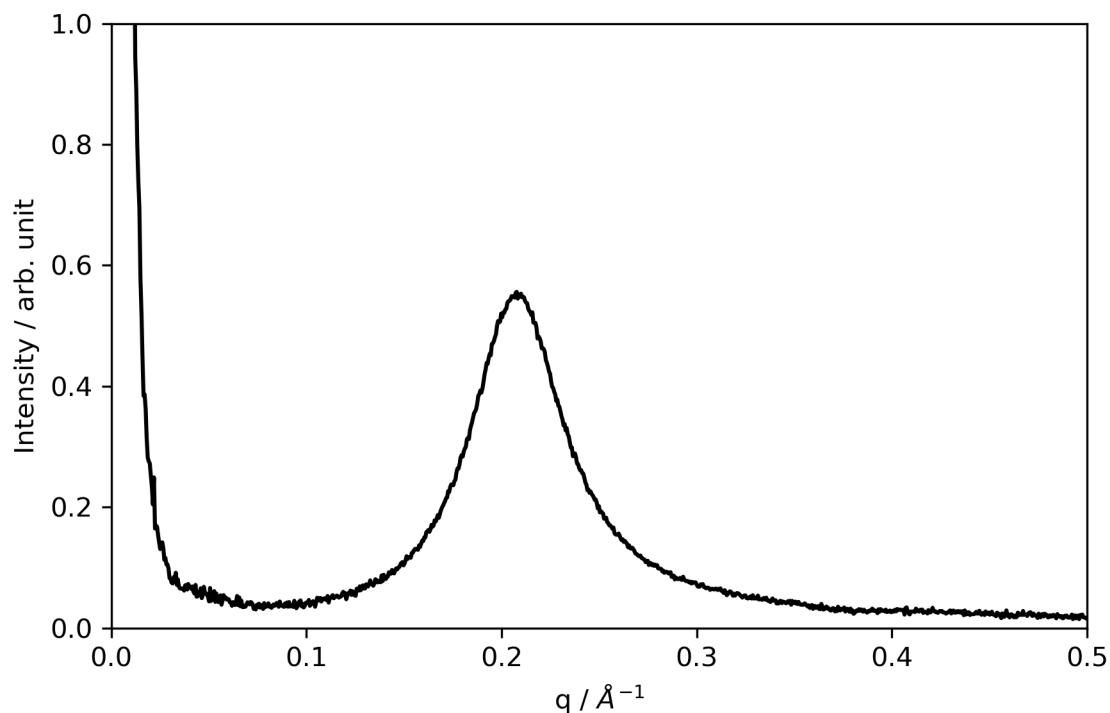

Figure S1. 1D SAXS pattern of a levitated particle of oleic acid:sodium oleate in a 1:1 wt held at 90 % RH for ~ 300 min. This peak corresponds to the inverse micellar phase with a  $d$ -spacing of 30.1 Å.

A sample of oleic acid-sodium oleate mixture (1:1 wt) was levitated and humidified to 90 % for ~ 300 min to afford the inverse micellar phase. The  $d$ -spacing observed for this system was 30.1 Å. There is a significant difference in  $d$ -spacing when compared with the  $d$ -spacings observed in our fructose-containing mixtures in the main text. The levitation-SAXS experiment is described in detail elsewhere.<sup>2,3</sup>

### S3. Identifying the ordered inverse micellar phases observed in this study

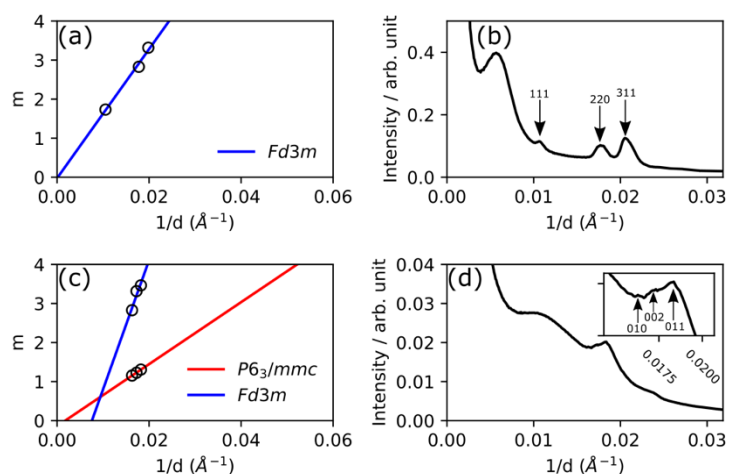

Figure S2. Indexing the inverse micellar cubic phases observed in this study. (a) - The  $m$  vs  $1/d$  plot with linear fit for the Fd3m cubic phase symmetry observed at high RH and (b) - the corresponding SAXS pattern with the miller indices ( $hkl$ ) of each scattered peak. (c) & (d) are the same plots for the  $P6_3/mmc$  symmetry observed during ozonolysis with an additional linear fit to the Fd3m symmetry, showing that the  $P6_3/mmc$  space group corresponds the best to the fitted peak positions.

In order to identify the cubic close-packed inverse micellar phases observed in this study, a relationship between the Miller indices ( $hkl$ ) of each scattering plane and  $1/d$  for each observed reflection. We define a parameter ( $m$ ) which is unique to each cubic symmetry group observed here:

$$m = \sqrt{(h^2 + k^2 + l^2)} \quad (\text{Fd3m symmetry})^4 \quad (1)$$

$$m = \sqrt{\frac{4}{3}(h^2 + k^2 + hk) + \frac{l^2}{R^2}} \quad (\text{P6}_3/\text{mmc symmetry})^5 \quad (2)$$

$R$  is the ratio of the cubic unit cell dimensions ( $c/a$ ) for the hexagonal close-packing of spheres for the  $P6_3/mmc$  space group, with a theoretical value of 1.663.<sup>5</sup> A linear relationship between  $m$  and experimentally observed peak positions  $1/d$  with an intercept at 0 would mean that the phase assignment is correct. This is the case for the Fd3m phase observed at high RH and with an organic composition of 50 wt % fructose (Fig. S2(a)). The cubic phase observed during ozonolysis of a 33 wt % fructose film is assigned to the  $P6_3/mmc$  arrangement, although the intercept was not quite 0. This may be due to the difficulty in fitting peaks which clearly have an overlapping scattering peak, affecting peak position determination (Fig. S2(c) & (d)). What is certain is that this set of peaks did not correspond to the Fd3m phase.

The slopes of these plots give the unit cell dimension ( $a$ ) for each phase. These were 165 Å for the Fd3m phase and 79 Å for the  $P6_3/mmc$  phase. This corresponds to a micellar diameter of 117 Å for the Fd3m phase (where  $a = \sqrt{2} \times \text{diameter}$ ) and 79 Å for the  $P6_3/mmc$  phase (where  $a = \text{diameter}$ ). These values are higher than the 80 Å (Fd3m) and 76 Å ( $P6_3/mmc$ ) indexed in a previous study on levitated particles of this system without fructose.<sup>2</sup>

This further corroborates what was discussed in the main text: the addition of fructose increases the size of inverse micelles formed.

## References

- 1 A. Milsom, A. M. Squires, B. Woden, N. J. Terrill, A. D. Ward and C. Pfrang, *Faraday Discuss.*, 2021, Advance Article, DOI:10.1039/D0FD00088D.
- 2 C. Pfrang, K. Rastogi, E. R. Cabrera-Martinez, A. M. Seddon, C. Dicko, A. Labrador, T. S. Plivelic, N. Cowieson and A. M. Squires, *Nat. Commun.*, 2017, **8**, 1724.
- 3 A. M. Seddon, S. J. Richardson, K. Rastogi, T. S. Plivelic, A. M. Squires and C. Pfrang, *J. Phys. Chem. Lett.*, 2016, **7**, 1341–1345.
- 4 J. M. Seddon, E. A. Bartle and J. Mingins, *J. Phys. Condens. Matter*, 1990, **2**, SA285–SA290.
- 5 M. Clerc, *J. Phys. II*, 1996, **6**, 961–968.
